# Supplementary material for: TransMeta simultaneously assembles multisample RNA-seq reads
Source: HighWire-hosted journal article supplement (doi:10.1101/gr.276434.121), 2022-07-01
Supplement: Supplemental_Material.pdf [file Supplemental_Material.pdf]

## Supplemental Material

### TransMeta simultaneously assembles multi-sample RNA-seq reads

Ting Yu<sup>1,†</sup> Xiaoyu Zhao<sup>1,2,†</sup> Guojun Li<sup>1,3,\*</sup>

<sup>1</sup>Research Center for Mathematics and Interdisciplinary Sciences, Shandong University, Qingdao, 266237, China

<sup>2</sup>School of Mathematics, Shandong University, Jinan, Shandong, 250100, China

<sup>3</sup>School of Mathematical Science, Liaocheng University, Liaocheng 252000, China

\* To whom correspondence should be addressed

†These authors contributed equally to this work

### Contents of Supplemental Material

1. Supplemental Notes
2. Supplemental Methods
3. Supplemental Figures (S1-S11)
4. Supplemental Tables (S1-S7)

#### 1. Supplemental Notes

##### 1.1 Parameter setup for the compared assemblers

We used HISAT2 and STAR to produce all alignments for the RNA-seq samples, where STAR was run with its default settings and HISAT2 was run with the option *--dta* (in the HISAT2 manual it means “*reports alignments tailored for transcript assemblers*”). The default parameters are used for the single-sample assemblers StringTie2 and Scallop to produce transcripts for each sample. To draw the precision-recall curves for each assembler at meta-assembly level, we used a wide range of minimum coverage thresholds to get the results. Thus, TransMeta was set the parameter *-min\_meta\_trans\_cov* to be 0, 0.5, 1, 2(default), 5, 10, 20, 30, 50, 100, 150. PsiCLASS was set the parameter *-d* for its vote-transcripts procedure to be 0, 0.5, 1(default), 2, 3, 5, 10, 30, 50, 100, 200. TACO was set the parameter *-- isoform-frac* to be 0.01, 0.05(default), 0.1, 0.2, 0.3, 0.4, 0.5, 0.6, 0.7, 0.8 and StringTie2-Merge was set the parameter *-F* to be 0.01, 1(default), 1.5, 2, 2.5, 3, 3.5,

4, 5, 6. Detailed versions and running command for all the tools are described below. All the assemblers were tested on a server with 768GB of RAM and 32core of CPU. Besides, it is worth mentioning that the gtfmerge tool was downloaded from <https://github.com/Kingsford-Group/rnaseqtools>.

|           |          |                                                                                                                                                                                                                                                                                                                                                                                                                                                                                                                                                                                                                                   |
|-----------|----------|-----------------------------------------------------------------------------------------------------------------------------------------------------------------------------------------------------------------------------------------------------------------------------------------------------------------------------------------------------------------------------------------------------------------------------------------------------------------------------------------------------------------------------------------------------------------------------------------------------------------------------------|
| HISAT2    | 2.0.5    | hisat2-build <i>GenomeFile.fasta</i> <b>Index</b> -p 20<br>hisat2 -x <i>Index</i> -1 <i>fastq1</i> -2 <i>fastq2</i> -S <i>SamFile</i> -p 20 --dta<br><b>STAR</b> --runThreadN 20 --runMode <i>genomeGenerate</i> --genomeDir<br><i>Index</i> --genomeFastaFiles <i>GenomeFile.fasta</i><br><b>STAR</b> --outSAMstrandField <i>intronMotif</i> --runThreadN 10<br>--genomeDir <i>Index</i> --readFilesIn <i>fastq1 fastq2</i>                                                                                                                                                                                                      |
| TransMeta | v.1.0    | TransMeta -B <i>BamList</i> -s <i>strandness</i> -p 25 -o <i>TransMetaDir</i><br>--min_meta_trans_cov <i>coverage-threshold</i>                                                                                                                                                                                                                                                                                                                                                                                                                                                                                                   |
| PsiClass  | v1.0.1   | psiclass --lb <i>BamList</i> -p 25<br>vote-transcripts --lg <i>psiclass-GtfList</i> -d <i>coverage-threshold</i>                                                                                                                                                                                                                                                                                                                                                                                                                                                                                                                  |
| StringTie | 2.1.4    | stringtie <i>bamfile</i> -o <i>GtfFile</i><br>stringtie --merge <i>GtfList</i> -F <i>coverage-threshold</i>                                                                                                                                                                                                                                                                                                                                                                                                                                                                                                                       |
| Scallop   | v.0.10.4 | scallop -i <i>bamfile</i> -o <i>GtfFile</i> --library_type <i>strandness</i>                                                                                                                                                                                                                                                                                                                                                                                                                                                                                                                                                      |
| TACO      | 0.7.3    | taco_run <i>GtfList</i> -p 10 -o <i>TACO-outdir</i> --gtf-expr-attr <i>RPKM</i><br>--isoform-frac <i>filtering-thresholds</i><br>rsem-prepare-reference --gtf <i>transcripts.gtf</i> <i>genome.fa</i> <i>ref_name</i><br>--bowtie2<br>rsem-calculate-expression --paired-end <i>reads_1.fq reads_2.fq</i><br><i>ref_name</i><br><i>sample_name.stat</i> --bowtie2<br>rsem-simulate-reads <i>ref_name</i><br><i>sample_name.stat.stat/sample_name.stat.model</i><br><i>sample_name.stat.isoforms.results</i> 0.25 <i>read_number</i> <i>simulated_reads</i><br>kallisto <b>index</b> -i <i>kallisto_index</i> <i>transcript.fa</i> |
| kallisto  | 0.43.1   | kallisto <b>quant</b> -i <i>kallisto_index</i> -t 20 -o <i>kallisto_results</i> <i>reads_1.fastq</i><br><i>reads_2.fastq</i>                                                                                                                                                                                                                                                                                                                                                                                                                                                                                                      |
| gtfmerge  | -        | gtfmerge <b>union</b> <i>gtf-list</i> <i>GTFMerge.gtf</i> -t 10                                                                                                                                                                                                                                                                                                                                                                                                                                                                                                                                                                   |

## **1.2 Reference genome and transcripts used in this study**

In order to evaluate the performances of the assemblers on real datasets, we downloaded the reference genome and transcriptome of the species *Homo sapiens* (version: GRCh38/hg38) from the UCSC Genome Browser at <http://genome.ucsc.edu/cgi-bin/hgTables>. As an alternative, the reference genome and transcriptome used in this research could also be available at <https://sourceforge.net/projects/transmeta/files/RealData/>.

## **1.3 Description for the simulated datasets**

We simulated 3 datasets (S1, S2 and S3) in this research, with different sample size, different read lengths, and different sequence depths, by using the RSEM-simulator. The parameters (e.g., abundances, fragment and read length distributions, and sequencing error model parameters) of the RSEM simulation were learned from real data sets. We used different real datasets in this study to produce the simulated datasets. To be specific, the NCBI SRA accession code of 4 samples used for simulating data S1 were SRR7807483, SRR7807484, SRR7807485, and SRR7807486; the 5 samples used for simulating data S2 were SRR8315677, SRR8315678, SRR8315679, SRR8315680, and SRR8315682; and the 3 samples used for simulating data S3 were the 3 samples in the real dataset R7. For each of the samples, we produced 5 simulated RNA-seq data sets, therefore there were 20 samples in S1, 25 in S2, and 15 in S3. In the simulation process of RSEM, the first step is to estimate the abundances of a reference transcripts via using a real dataset. Then based on the estimated abundances and other sequencing model parameters, RSEM simulated the RNA-seq reads. Therefore, for each simulated RNA-seq sample, we explicitly know the expressed transcripts and the abundance of each expressed transcript. Subsequently, we set all the expressed transcripts from all the simulated samples as the ground truth for the whole RNA-seq simulation experiment (i.e. the ground truth for benchmarking the assemblers at the meta-assembly level), and for each transcript in the ground truth, we set the sum of this transcript's abundances from each sample as its expression level. Then, we first sorted the transcripts in the ground truth according to their expression levels, and all the expressed transcripts were equally divided into three parts, which corresponded to low, middle, and high expressed ones. The alignments of all the 60 simulated samples produced by HISAT2 and STAR. Particularly, as an illustration, we uploaded the HISAT2 alignments of the 20 samples in S1 to the website

<https://sourceforge.net/projects/transmeta/files/SimulatedData/>, as well as the ground truth for each sample and for the whole experiment. And, we also uploaded the assemble results of the tested assemblers to this website. The readers can easily and freely obtain the files.

#### 1.4 Description for the real datasets

Raw sequence data for the real datasets R1-R6 can be obtained from NCBI BioProject under the accession [PRJNA575230](#), [PRJNA531468](#), [PRJEB35202](#), [PRJNA509906](#), [PRJNA489891](#) and [PRJNA30709](#) respectively. Specifically, in this research, R1 contains all the 73 runs from PRJNA575230; R2 contains all the 48 runs from PRJNA531468; R3 contains all the 35 runs from PRJEB35202; R4 contains 21 runs from PRJNA509906 with SRA accession code from SRR8315677 to SRR8315697; R5 contains all the 12 runs from PRJNA489891; and R6 contains 6 runs from PRJNA30709 with SRA accession code from SRR534319 to SRR534324. And sequence data for R7 (MCF-7) can be downloaded from UCSC genome browser at the website <http://hgdownload.soe.ucsc.edu/goldenPath/hg19/encodeDCC/wgEncodeCaltechRnaSeq>. The GEUVADIS population variation project were publicly available from ArrayExpress with accession E-GEUV-6. Moreover, the assembled results of each assembler for datasets R1-R5 in the main text could be freely available at <https://sourceforge.net/projects/transmeta/files/>.

## 2. Supplemental Methods

### Details for the constrained program.

The constrained optimization problem tries to link the in-coming and out-going splice junctions by optimally finding pairs of vectors respectively associated with in-coming and out-going splice junctions (edges) base on cosine similarity. Suppose that there are  $m$  in-coming splice junctions  $\{j_1, j_2, \dots, j_m\}$  and  $n$  out-going splice junctions  $\{j'_1, j'_2, \dots, j'_n\}$  for a given exon, and denote  $CP$  as the set of consensus paired paths. In the constrained program, the variable  $M$  indicates that both the in-coming and out-going junctions for an exon will be partitioned into  $M$  ( $1 < M \leq \min(m, n)$ ) parts, denoted as  $P_1, P_2, \dots, P_M$  and  $P'_1, P'_2, \dots, P'_M$ . And  $P_i$  and  $P'_i$  are one-to-one correspondence, which indicates that a splice junction in  $P_i$  ( $P_i$ ) can only be connected to a junction in  $P'_i$  ( $P_i$ ) in the following path searching procedure. Since we expect that the corresponding parts  $P_i$  and  $P'_i$

possess higher similarity, the objective is then taken to maximize the minimum one in  $\{cs(P_1, P'_1), cs(P_2, P'_2), \dots, cs(P_M, P'_M)\}$ , with the constraints 1)  $\bigcup_{i=1}^M P_i = \{j_1, j_2, \dots, j_m\}$  ensuring that each in-coming junction should belong to one part  $P_i$ ; 2)  $\bigcup_{i=1}^M P'_i = \{j'_1, j'_2, \dots, j'_n\}$  ensuring that each out-going junction should belong to one part  $P'_i$ ; 3)  $P_i \cap P_k = \emptyset$  &  $P'_i \cap P'_k = \emptyset$  if  $(i \neq k)$  ensuring that a junction can only belong to one part; 4)  $cs(P_i, P'_i) > cs(P_i, P'_k), i = 1, 2, \dots, M$  and  $i \neq k$  meaning that the similarity between the corresponding parts should be higher than others; 5)  $cs(P_i, P'_i) \geq \rho, 0 < \rho < 1$ , where  $\rho$  is a parameter, meaning that the cosine similarity between the corresponding parts should be larger than  $\rho$ ; 6)  $\exists k \in [1, M]$  such that  $j \in P_k$  and  $j' \in P'_k$ , if  $(j, j') \in cp, cp \in CP$  meaning that if there exist a consensus paired path continuously contains  $j$  and  $j'$ , then  $j$  and  $j'$  should be in a certain pair of the corresponding parts  $P_k$  and  $P'_k$ . Therefore, the constrained program takes both the paired-end information and the vector weights (i.e. the sequence depth information of each sample) into account, which leads to accurately combing the splice junctions for an exon.

### 3. Supplemental Figures

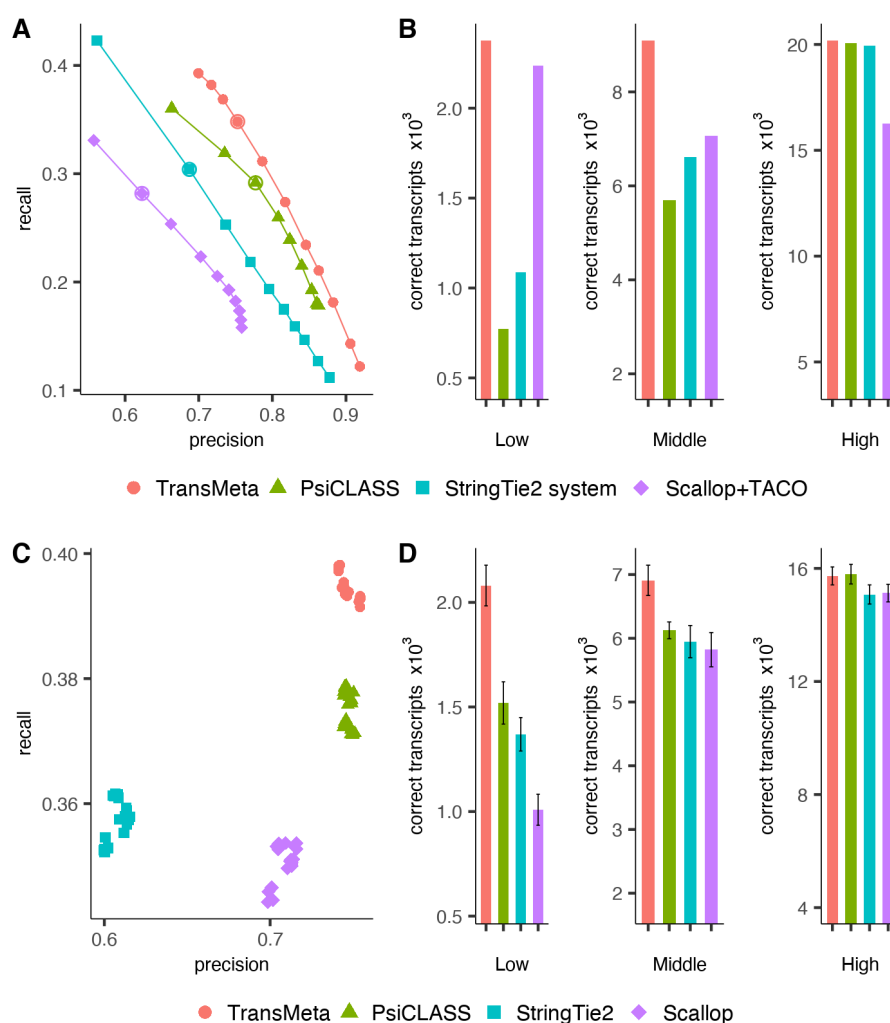

**Figure S1:** Performance evaluations on the simulated dataset S1 under the STAR alignments. **A)** Precision-recall curves of the assemblers. The points on the curve of an assembler correspond to the filtering thresholds of the assembler, and the circled one to the default value. **B)** Distributions of numbers of correctly recovered transcripts against the tools that were separately counted according to whether their expression is low, middle, or high at the meta-assembly level. **C)** The precisions and recalls of the assemblers on different samples at the individual samples level under their default settings. Different colors correspond to different assemblers, and each point corresponds to a specific sample. **D)** Distributions of averaged numbers of correctly recovered transcripts against the tools that were separately counted according to whether their expression is low, middle, or high at the individual samples level. The error bars show the standard deviation across the samples.

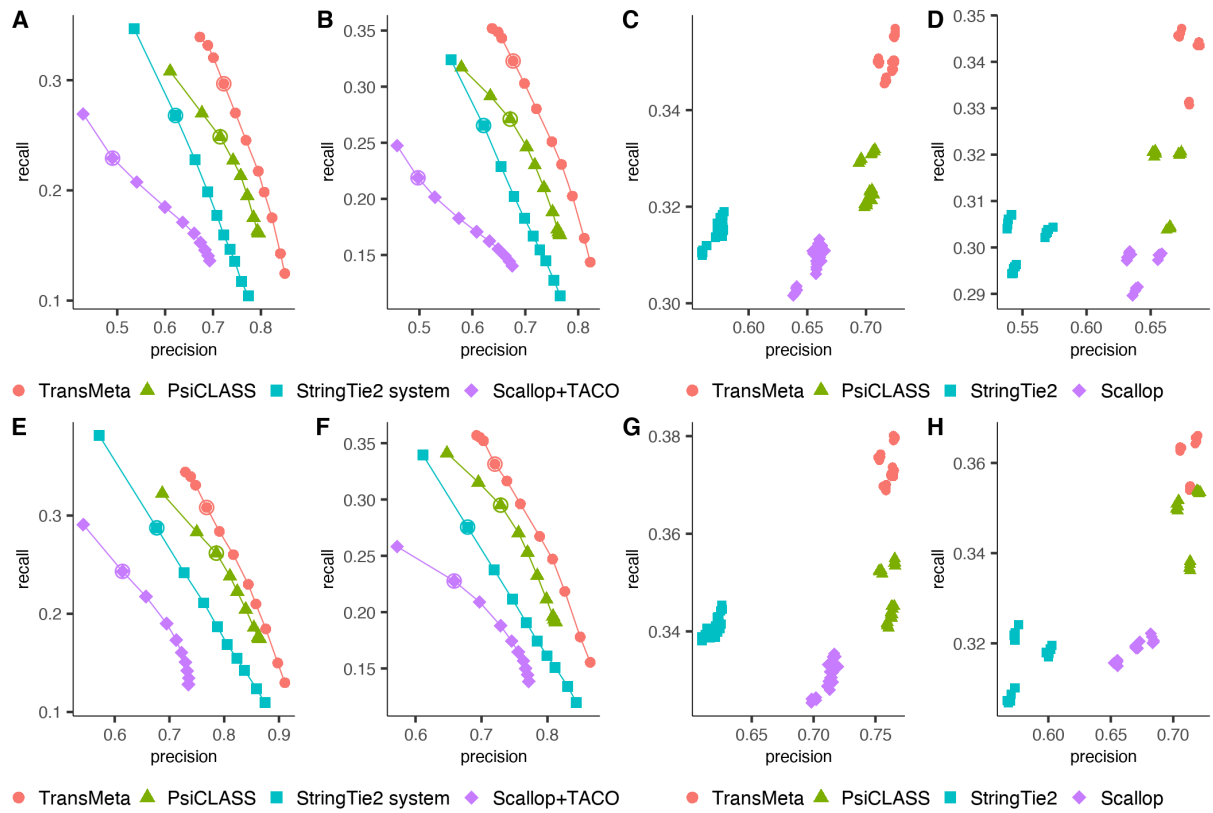

**Figure S2:** When employing the HISAT2 alignment, precision-recall curve of each assembler at the meta-assembly level **A)** on the dataset S2 and **B)** on the dataset S3; precisions and recalls of each assembler at the individual sample level **C)** on the dataset S2 and **D)** on the dataset S3. When employing the STAR alignments, precision-recall curve of each assembler at the meta-assembly level **E)** on the datasets S2 and **F)** on the dataset S3; precisions and recalls of each assembler at the individual sample level **G)** on the dataset S2 and **H)** on the dataset S3.

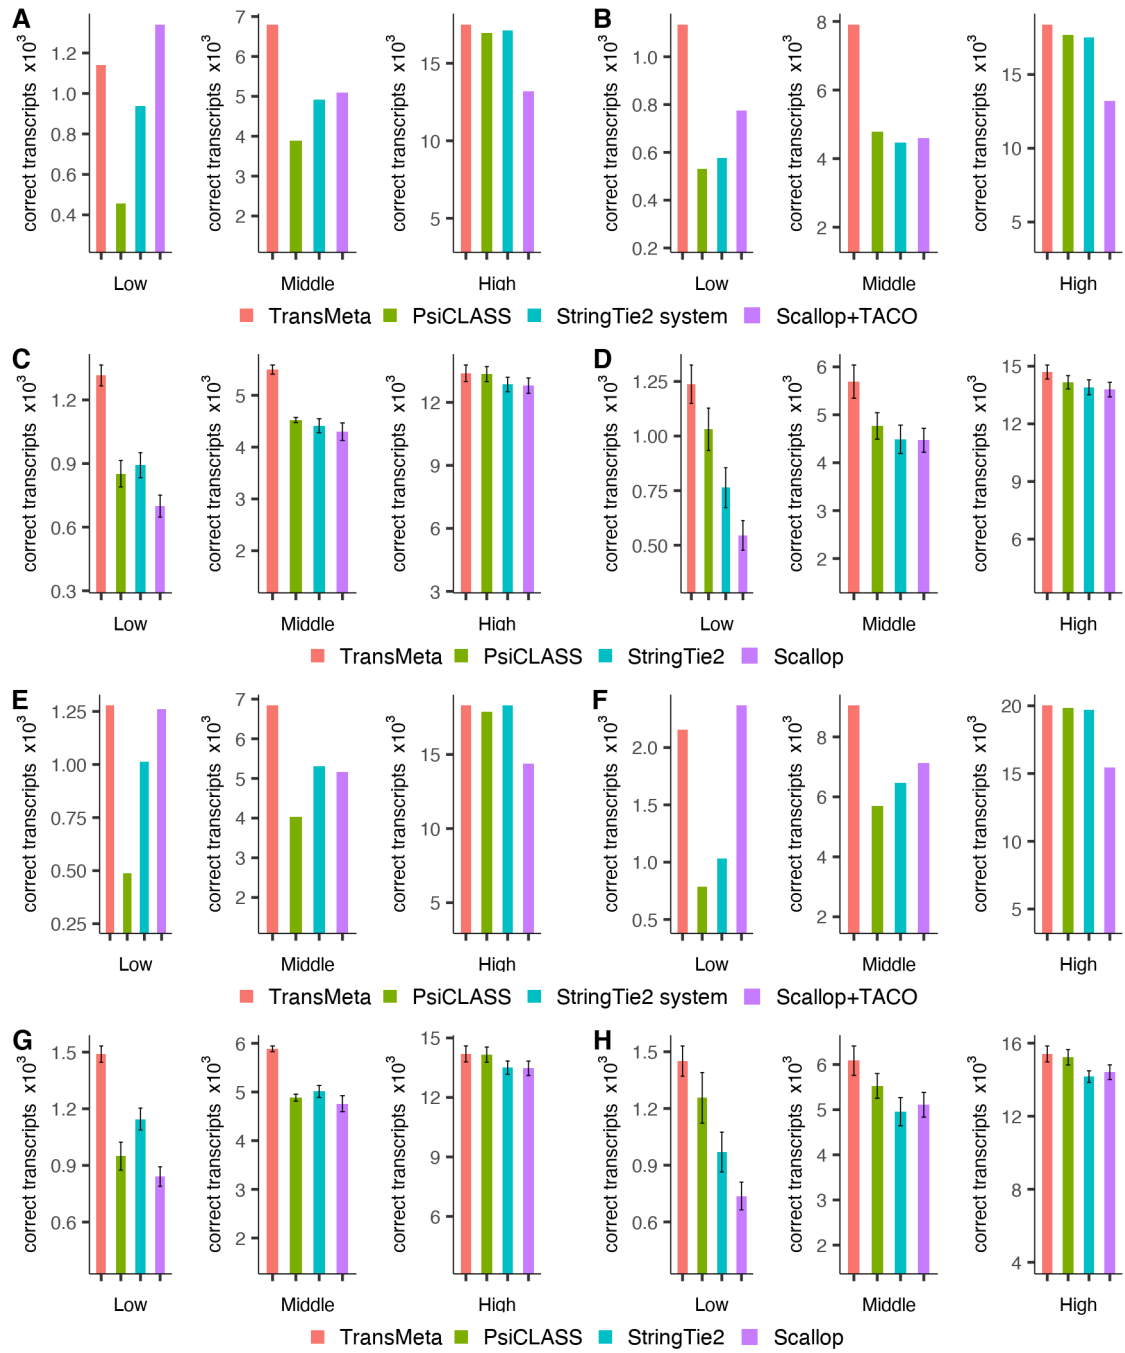

**Figure S3:** Under the HISAT2 alignments, correctly recovered transcripts of the assemblers based on different expression levels at the meta-assembly level **A)** on the dataset S2 and **B)** on the dataset S3; at the individual sample level **C)** on the dataset S2, and **D)** on the dataset S3. Under the STAR alignments, correctly recovered transcripts of the assemblers based on different expression levels at the meta-assembly level **E)** on the dataset S2 and **F)** on the dataset S3; at the individual sample level **G)** on the dataset S2, and **H)** on the dataset S3. The error bars show the standard deviation across the samples.



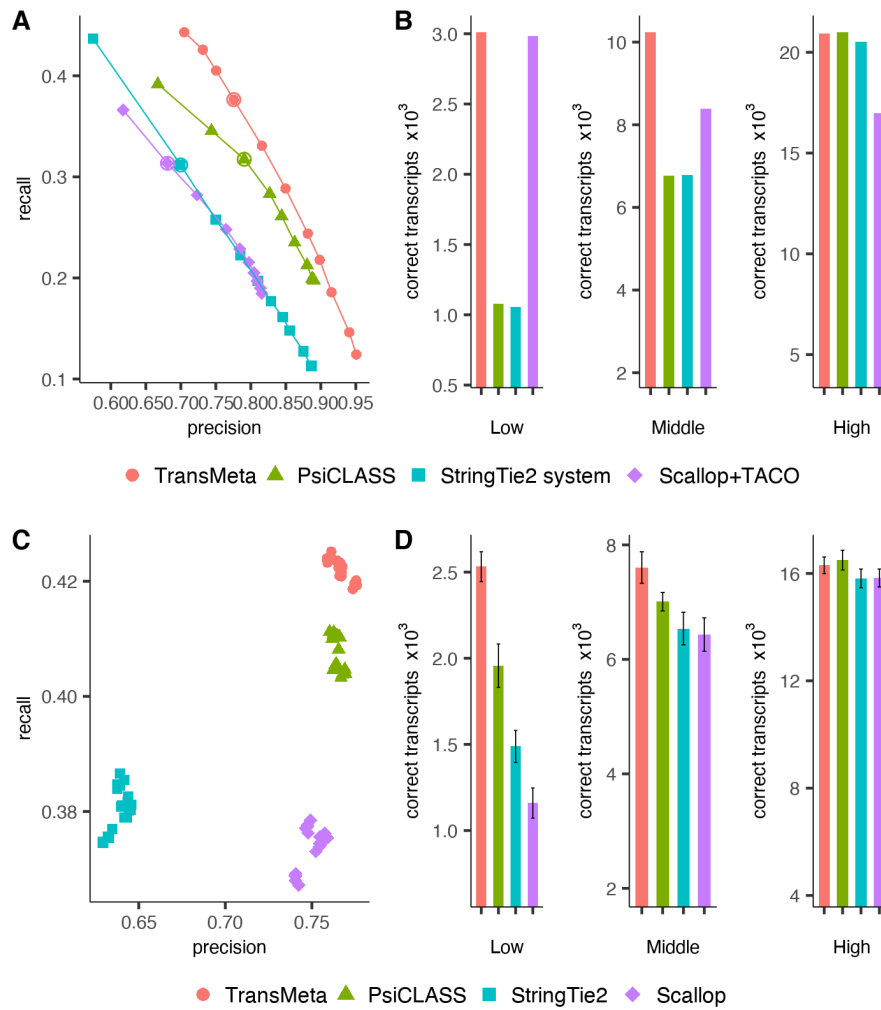

**Figure S4:** Performance evaluations when employing `--ss` and `--exon` options to build the index for the HISAT2 alignments. **A)** Precision-recall curves of the assemblers. The points on the curve of an assembler correspond to the filtering thresholds of the assembler, and the circled one to the default value. **B)** Distributions of numbers of correctly recovered transcripts against the tools that were separately counted according to whether their expression is low, middle, or high at the meta-assembly level. **C)** The precisions and recalls of the assemblers on different samples at the individual samples level under their default settings. Different colors correspond to different assemblers, and each point corresponds to a specific sample. **D)** Distributions of averaged numbers of correctly recovered transcripts against the tools that were separately counted according to whether their expression is low, middle, or high at the individual samples level. The error bars show the standard deviation across the samples.

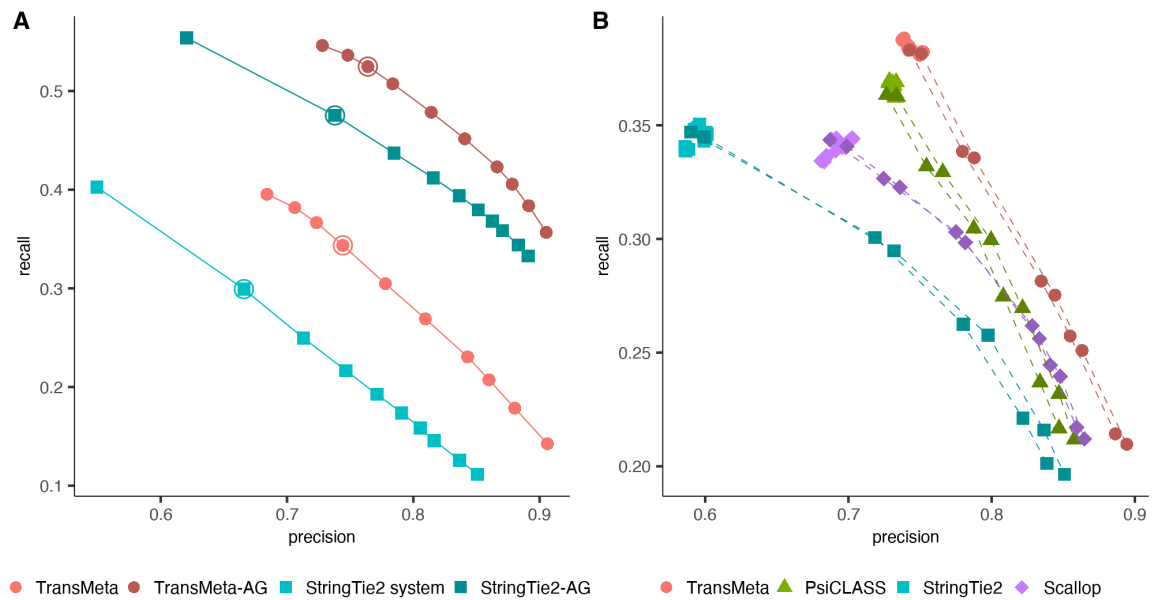

**Figure S5.** When employing the HISAT2 alignments, **A)** precision-recall curves for the annotation guided mode of TransMeta and StringTie2 system on the simulated dataset S1 at the meta-assembly level. The points on each curve correspond to the filtering thresholds of each assembler, and the circled one to the default value. TransMeta-AG means TransMeta was run with its option *-g*, and StringTie2-AG means StringTie2 *--merge* was run with its option *-G*. The reference transcripts provided to the assemblers were produced in the following way, we first randomly selected 25% the transcripts from the ground truth, then we added about 10% noise (transcripts that are not in the ground truth) to the selected ones as the final reference transcripts that provided to TransMeta and StringTie2; **B)** precision-recall curves of the assemblers on the simulated dataset S1 at the individual sample level. From the dataset S1, we selected two samples to draw the precision-recall curve with a range of filtering thresholds for each assembler.

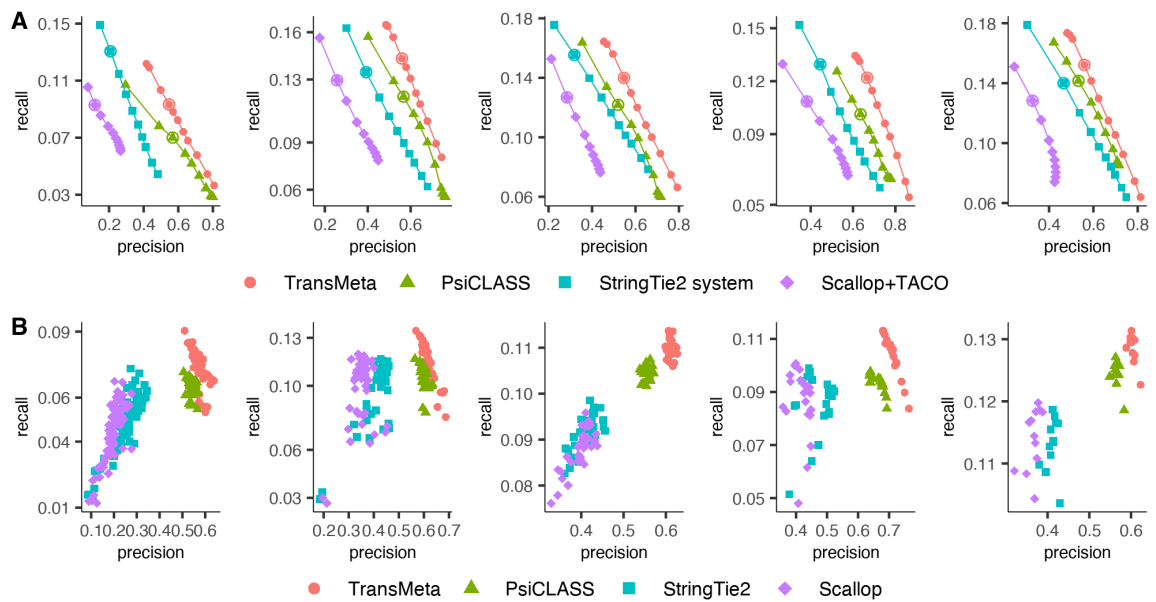

**Figure S6.** Performance evaluations on the five real datasets R1-R5 under the STAR alignments.

**A)** Precision-recall curves of the assemblers. The points on each curve correspond to the filtering thresholds of each assembler, and the circled one to the default value. **B)** The precisions and recalls of the assemblers on different samples at the individual samples level under their default settings. Different colors correspond to different assemblers, and each point corresponds to a specific sample.

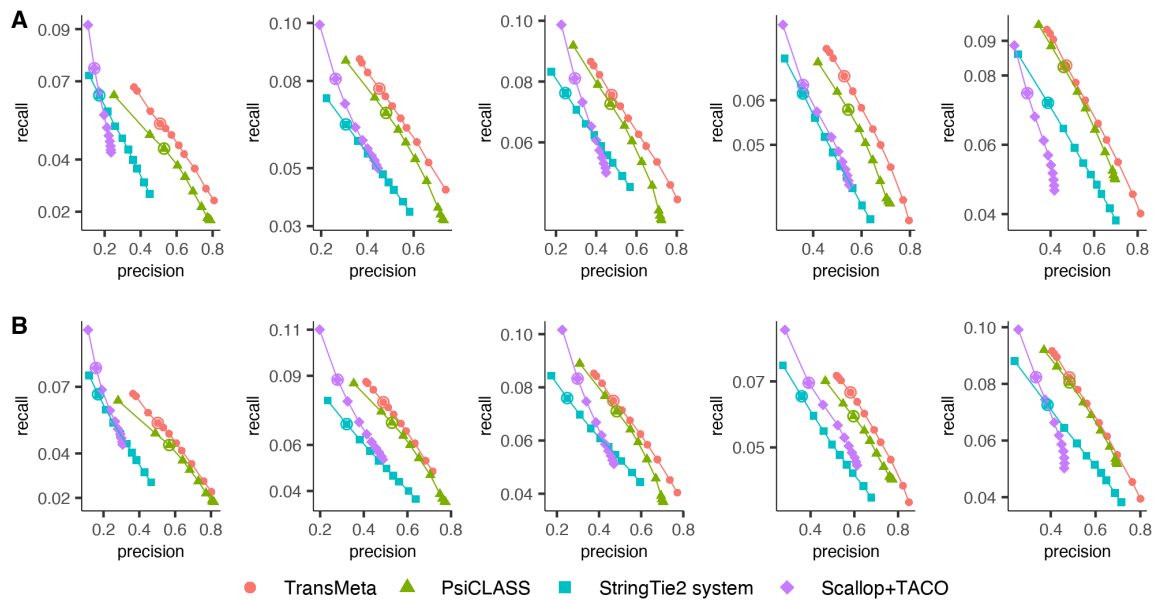

**Figure S7** Precision-recall curves of assemblers on the five real datasets R1-R5 at the meta-assembly level according to the ground truth of GENECODE annotations **A)** under the HISAT2 alignments, and **B)** under the STAR alignments. The points on each curve correspond to the filtering thresholds of each assembler, and the circled one to the default value.

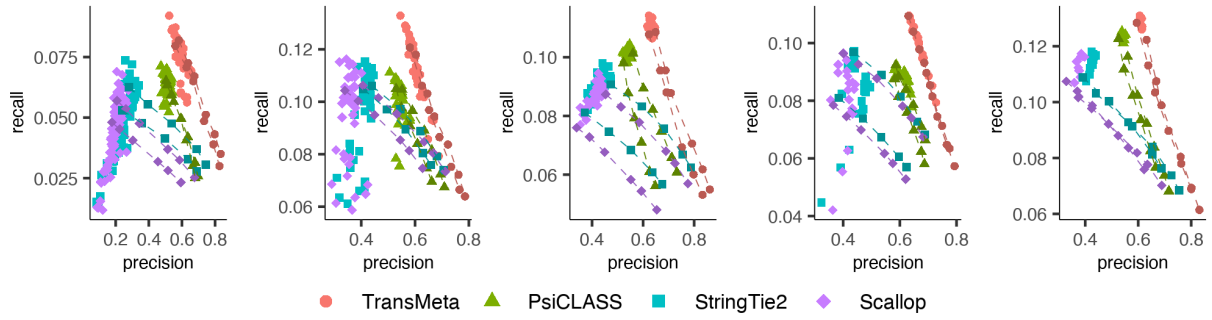

**Figure S8** When employing the HISAT2 alignments, precision-recall curves for the assemblers on the five real datasets(R1-R5) at the individual sample level. From each of the datasets R1-R5, we selected two samples to draw the precision-recall curve with a range of filtering thresholds for each assembler.

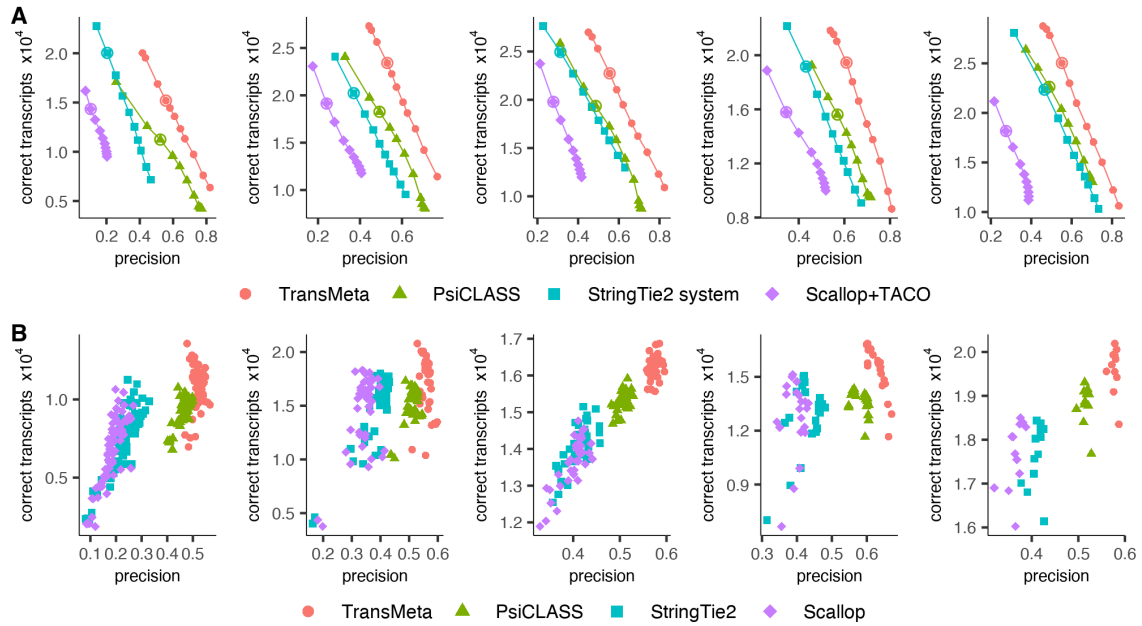

**Figure S9.** Based on the ground truth that estimated by kallisto, when employing the HISAT2 alignments, **A)** precision-correct number curves of the assemblers on the five real datasets R1-R5 at the meta-assembly level. The points on each curve correspond to the filtering thresholds of each assembler, and the circled one to the default value; **B)** precisions and correctly assembled transcripts of the assemblers on the five real datasets R1-R5 at the individual sample level under the default settings. Each point corresponds to specific a sample.

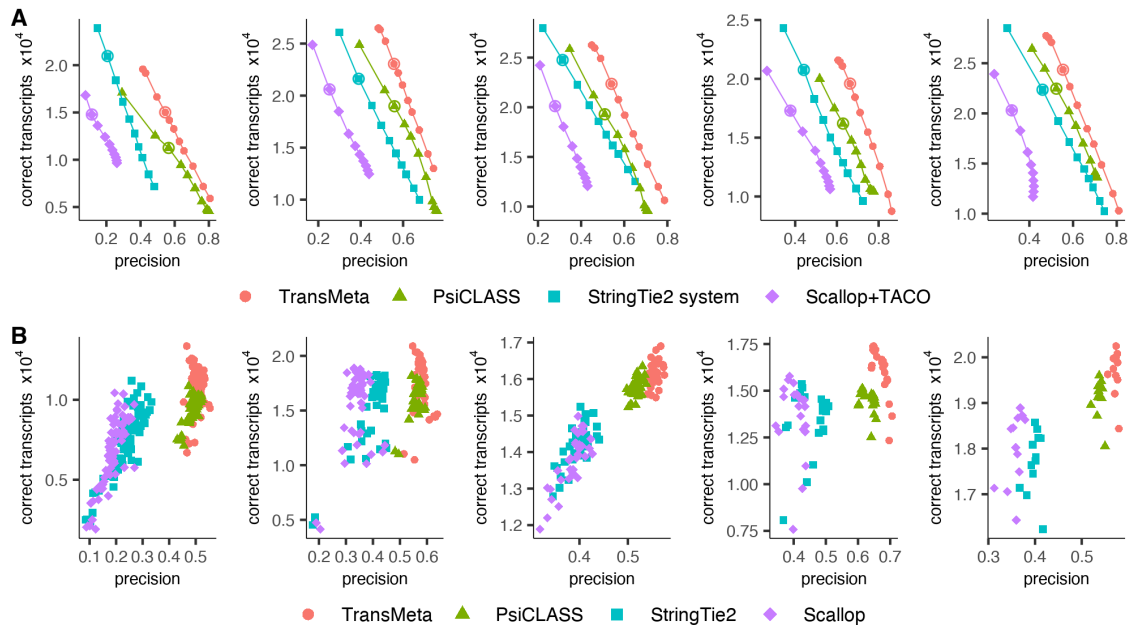

**Figure S10.** Based on the ground truth that estimated by kallisto, when employing the STAR alignments, **A)** precision-correct number curves of assemblers on the five real datasets R1-R5 at the meta-assembly level. The points on each curve correspond to the filtering thresholds of each assembler, and the circled one to the default value; **B)** precisions and correctly assembled transcripts of assemblers on the five real datasets R1-R5 at the individual sample level under the default settings. Each point corresponds to a specific sample.

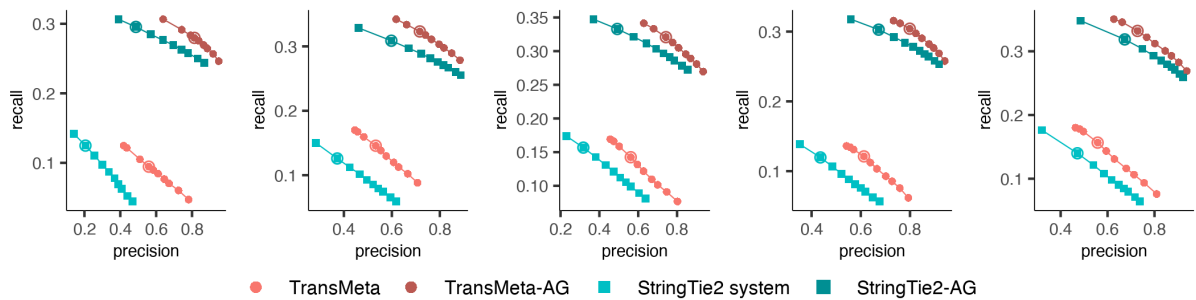

**Figure S11** When employing the HISAT2 alignments, precision-recall curves for the annotation-guided mode of TransMeta and StringTie2 system on the five real datasets R1-R5 at the meta-assembly level. The points on each curve correspond to the filtering thresholds of each assembler, and the circled one to the default value. TransMeta-AG means TransMeta was run with its option `-g`, and StringTie2-AG means StringTie2 `--merge` was run with its option `-G`. The reference transcripts provided to the assemblers were produced in the following way, we randomly selected 25% the reference transcripts from the NCBI\_RefSeq annotations as the input for TransMeta and StringTie2.

#### 4. Supplemental Tables

**Table S1.** Correctly recovered transcripts, candidates, precision, recall and F-score of the assemblers on the simulated dataset S1 at the meta-assembly level under the HISAT2 alignments. The abbreviations ST is for StringTie2, and SC for Scallop, and assembler-0 means the results for running the assembler with the minimum filtering threshold, and assembler-default indicates the results for the default settings.

| Assemblers         | Correct transcripts | Candidates | precision | recall | F-score |
|--------------------|---------------------|------------|-----------|--------|---------|
| TransMeta-0        | 36119               | 52797      | 0.6841    | 0.3954 | 0.5011  |
| TransMeta-default  | 31389               | 42179      | 0.7442    | 0.3436 | 0.4701  |
| PsiCLASS-0         | 32328               | 51628      | 0.6262    | 0.3539 | 0.4522  |
| PsiCLASS-default   | 26501               | 35410      | 0.7484    | 0.2901 | 0.4181  |
| ST+STmerge-0       | 36782               | 66929      | 0.5496    | 0.4026 | 0.4648  |
| ST+STmerge-default | 27334               | 41051      | 0.6659    | 0.2992 | 0.4129  |
| SC+TACO-0          | 29106               | 61637      | 0.4722    | 0.3186 | 0.3805  |
| SC+TACO-default    | 25090               | 47338      | 0.5300    | 0.2746 | 0.3618  |
| gtfmerge+ST        | 47858               | 195278     | 0.2451    | 0.5239 | 0.3339  |
| gtfmerge+SC        | 42574               | 126783     | 0.3358    | 0.4660 | 0.3903  |

**Table S2.** Correctly recovered transcripts, candidates, precision, recall and F-score of the assemblers on the real dataset R1 at the meta-assembly level under the HISAT2 alignments. The abbreviations ST is for StringTie2, and SC for Scallop, and assembler-0 means the results for running the assembler with the minimum filtering threshold, and assembler-default indicates the results for the default settings.

| Assemblers         | Correct transcripts | Candidates | precision | recall | F-score |
|--------------------|---------------------|------------|-----------|--------|---------|
| TransMeta-0        | 20143               | 48123      | 0.4186    | 0.1247 | 0.1922  |
| TransMeta-default  | 15257               | 27290      | 0.5591    | 0.0945 | 0.1616  |
| PsiCLASS-0         | 17292               | 66145      | 0.2614    | 0.1071 | 0.1519  |
| PsiCLASS-default   | 11303               | 21473      | 0.5264    | 0.0700 | 0.1235  |
| ST+STmerge-0       | 22912               | 162639     | 0.1409    | 0.1419 | 0.1414  |
| ST+STmerge-default | 20150               | 97915      | 0.2058    | 0.1248 | 0.1553  |
| SC+TACO-0          | 16197               | 219191     | 0.0739    | 0.1003 | 0.0851  |
| SC+TACO-default    | 14337               | 135559     | 0.1058    | 0.0888 | 0.0965  |
| gtfmerge+ST        | 33884               | 879155     | 0.0385    | 0.2098 | 0.0651  |
| gtfmerge+SC        | 28583               | 718865     | 0.0398    | 0.1770 | 0.0649  |

**Table S3.** Correctly recovered transcripts, candidates, precision, recall and F-score of the assemblers on the real dataset R2 at the meta-assembly level under the HISAT2 alignments. The abbreviations ST is for StringTie2, and SC for Scallop, and assembler-0 means the results for running the assembler with the minimum filtering threshold, and assembler-default indicates the results for the default settings.

| Assemblers         | Correct transcripts | Candidates | precision | recall | F-score |
|--------------------|---------------------|------------|-----------|--------|---------|
| TransMeta-0        | 27467               | 61646      | 0.4456    | 0.1701 | 0.2462  |
| TransMeta-default  | 23538               | 44183      | 0.5327    | 0.1457 | 0.2289  |
| PsiCLASS-0         | 24540               | 73239      | 0.3351    | 0.1519 | 0.2091  |
| PsiCLASS-default   | 18521               | 37038      | 0.5001    | 0.1147 | 0.1866  |
| ST+STmerge-0       | 24252               | 85673      | 0.2831    | 0.1501 | 0.1962  |
| ST+STmerge-default | 20344               | 54646      | 0.3723    | 0.1260 | 0.1882  |
| SC+TACO-0          | 23432               | 132436     | 0.1769    | 0.1451 | 0.1594  |
| SC+TACO-default    | 19441               | 79403      | 0.2448    | 0.1204 | 0.1614  |
| gtfmerge+ST        | 42235               | 530924     | 0.0795    | 0.2615 | 0.1220  |
| gtfmerge+SC        | 36798               | 417102     | 0.0882    | 0.2278 | 0.1272  |

**Table S4.** Correctly recovered transcripts, candidates, precision, recall and F-score of the assemblers on the real dataset R3 at the meta-assembly level under the HISAT2 alignments. The abbreviations ST is for StringTie2, and SC for Scallop, and assembler-0 means the results for running the assembler with the minimum filtering threshold, and assembler-default indicates the results for the default settings.

| Assemblers         | Correct transcripts | Candidates | precision | recall | F-score |
|--------------------|---------------------|------------|-----------|--------|---------|
| TransMeta-0        | 26994               | 59914      | 0.4505    | 0.1671 | 0.2438  |
| TransMeta-default  | 22741               | 40976      | 0.5550    | 0.1408 | 0.2246  |
| PsiCLASS-0         | 26473               | 82978      | 0.3190    | 0.1639 | 0.2166  |
| PsiCLASS-default   | 19775               | 39798      | 0.4969    | 0.1224 | 0.1965  |
| ST+STmerge-0       | 28059               | 121558     | 0.2308    | 0.1737 | 0.1982  |
| ST+STmerge-default | 25316               | 79770      | 0.3174    | 0.1567 | 0.2098  |
| SC+TACO-0          | 24182               | 112049     | 0.2158    | 0.1497 | 0.1768  |
| SC+TACO-default    | 20164               | 71114      | 0.2835    | 0.1248 | 0.1734  |
| gtfmerge+ST        | 42578               | 417259     | 0.1020    | 0.2636 | 0.1471  |
| gtfmerge+SC        | 35343               | 279982     | 0.1262    | 0.2188 | 0.1601  |

**Table S5.** Correctly recovered transcripts, candidates, precision, recall and F-score of the assemblers on the real dataset R4 at the meta-assembly level under the HISAT2 alignments. The abbreviations ST is for StringTie2, and SC for Scallop, and assembler-0 means the results for running the assembler with the minimum filtering threshold, and assembler-default indicates the results for the default settings.

| Assemblers         | Correct transcripts | Candidates | precision | recall | F-score |
|--------------------|---------------------|------------|-----------|--------|---------|
| TransMeta-0        | 21979               | 40554      | 0.5420    | 0.1361 | 0.2175  |
| TransMeta-default  | 19571               | 31937      | 0.6128    | 0.1212 | 0.2023  |
| PsiCLASS-0         | 19533               | 42117      | 0.4638    | 0.1209 | 0.1918  |
| PsiCLASS-default   | 15779               | 27398      | 0.5759    | 0.0977 | 0.1670  |
| ST+STmerge-0       | 22365               | 63491      | 0.3523    | 0.1385 | 0.1988  |
| ST+STmerge-default | 19324               | 44325      | 0.4360    | 0.1196 | 0.1878  |
| SC+TACO-0          | 19132               | 72245      | 0.2648    | 0.1185 | 0.1637  |
| SC+TACO-default    | 16008               | 45730      | 0.3501    | 0.0991 | 0.1545  |
| gtfmerge+ST        | 31116               | 230797     | 0.1348    | 0.1926 | 0.1586  |
| gtfmerge+SC        | 28287               | 206246     | 0.1372    | 0.1751 | 0.1538  |

**Table S6.** Correctly recovered transcripts, candidates, precision, recall and F-score of the assemblers on the real dataset R5 at the meta-assembly level under the HISAT2 alignments. The abbreviations ST is for StringTie2, and SC for Scallop, and assembler-0 means the results for running the assembler with the minimum filtering threshold, and assembler-default indicates the results for the default settings.

| Assemblers         | Correct transcripts | Candidates | precision | recall | F-score |
|--------------------|---------------------|------------|-----------|--------|---------|
| TransMeta-0        | 29092               | 62779      | 0.4634    | 0.1801 | 0.2594  |
| TransMeta-default  | 25297               | 45353      | 0.5578    | 0.1566 | 0.2446  |
| PsiCLASS-0         | 26998               | 70739      | 0.3817    | 0.1672 | 0.2325  |
| PsiCLASS-default   | 23067               | 46237      | 0.4989    | 0.1428 | 0.2221  |
| ST+STmerge-0       | 28481               | 89058      | 0.3198    | 0.1763 | 0.2273  |
| ST+STmerge-default | 22603               | 47951      | 0.4714    | 0.1399 | 0.2158  |
| SC+TACO-0          | 21649               | 97810      | 0.2213    | 0.1340 | 0.1670  |
| SC+TACO-default    | 18557               | 66018      | 0.2811    | 0.1149 | 0.1631  |
| gtfmerge+ST        | 39578               | 245046     | 0.1615    | 0.2450 | 0.1947  |
| gtfmerge+SC        | 36155               | 240244     | 0.1505    | 0.2238 | 0.1800  |



**Table S7** Comparison of running time and memory usage for the assemblers on the five real datasets under the HISAT2 and STAR alignments.

|    |        |                    | TransMeta | Psiclass | StringTie2 | Scallop |
|----|--------|--------------------|-----------|----------|------------|---------|
| R1 | HISAT2 | running time(min)  | 133       | 228      | 188        | 251     |
|    |        | Maximum memory(MB) | 11463     | 11975    | 402        | 5017    |
|    | STAR   | running time(min)  | 142       | 91       | 192        | 233     |
|    |        | Maximum memory(MB) | 3757      | 10192    | 245        | 5222    |
| R2 | HISAT2 | running time(min)  | 140       | 143      | 292        | 380     |
|    |        | Maximum memory(MB) | 29937     | 6808     | 3481       | 32870   |
|    | STAR   | running time(min)  | 141       | 76       | 227        | 360     |
|    |        | Maximum memory(MB) | 6924      | 6309     | 465        | 32563   |
| R3 | HISAT2 | running time(min)  | 35        | 22       | 52         | 102     |
|    |        | Maximum memory(MB) | 10188     | 4914     | 74         | 3891    |
|    | STAR   | running time(min)  | 35        | 13       | 51         | 96      |
|    |        | Maximum memory(MB) | 7532      | 3571     | 122        | 3993    |
| R4 | HISAT2 | running time(min)  | 31        | 16       | 65         | 88      |
|    |        | Maximum memory(MB) | 12966     | 2515     | 604        | 6246    |
|    | STAR   | running time(min)  | 26        | 13       | 116        | 81      |
|    |        | Maximum memory(MB) | 3140      | 3200     | 157        | 5632    |
| R5 | HISAT2 | running time(min)  | 35        | 61       | 52         | 105     |
|    |        | Maximum memory(MB) | 8010      | 2533     | 275        | 14745   |
|    | STAR   | running time(min)  | 36        | 13       | 426        | 103     |
|    |        | Maximum memory(MB) | 3691      | 3396     | 142        | 15052   |
